# Supplementary material
Source: PubMed Central journal article supplement (PMC4060681)
Supplement: 1406425111_pnas.201406425SI.pdf [file 1406425111_pnas.201406425SI.pdf]

# Supporting Information

Lindqvist et al. 10.1073/pnas.1406425111

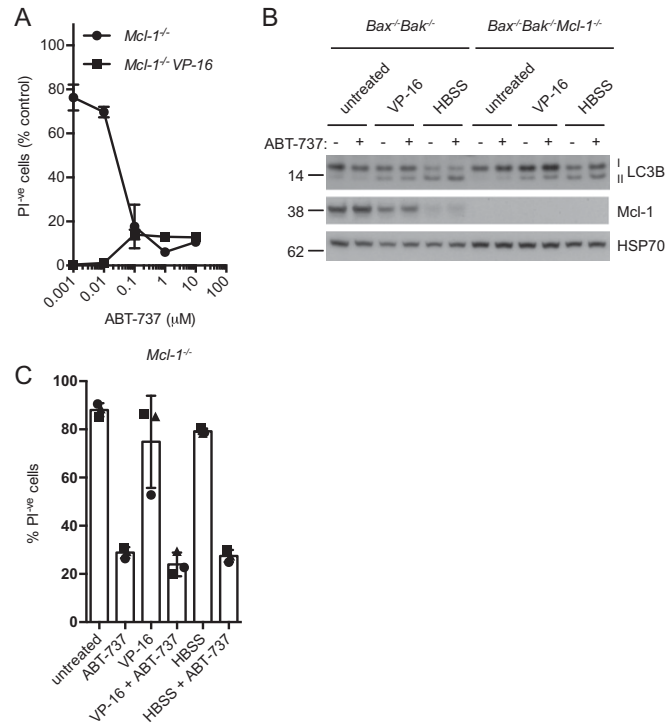

**Fig. S1.** (A) Mouse embryonic fibroblasts (MEFs) were cotreated with 34 μM etoposide (VP-16) and the indicated concentrations of ABT-737. After 96 h, viability was measured by the absence of propidium iodide (PI) uptake. The data for myeloid cell leukemia 1 (*Mcl-1*)-null MEFs in the absence of VP-16 is also shown in Fig. 1B for comparison. The means ± SD of two independent lines tested on two different occasions is shown ( $n = 4$ ). (B) Microtubule-associated protein 1 light chain 3 beta (LC3B) lipidation is unaltered by ABT-737 in fibroblasts lacking Bcl-2-associated X (*Bax*) and Bcl-2 homologous antagonist/killer (*Bak*). Western blot of MEFs after a 4-h treatment with 34 μM VP-16, HBSS, and 1 μM ABT-737 where indicated. (C) Viability of MEFs with functional *Bax* and *Bak* but lacking *Mcl-1* was measured via exclusion of PI after a 4-h treatment with 1 μM ABT-737, 34 μM VP-16, and HBSS (two independent *Mcl-1*<sup>-/-</sup> lines) in parallel with B. The mean ± SD of three independent experiments are indicated by squares, circles, and triangles.

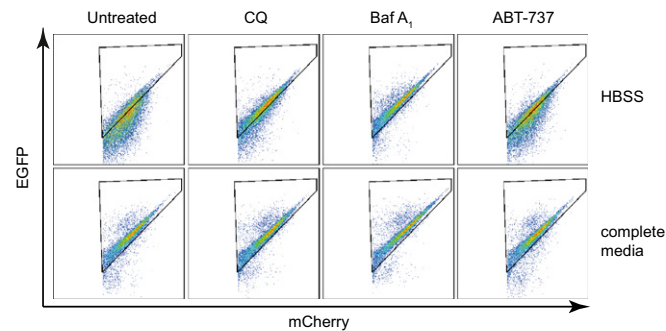

**Fig. S2.** Autophagolysosome function is unaltered by ABT-737. *Bax*<sup>-/-</sup>*Bak*<sup>-/-</sup>*Mcl-1*<sup>-/-</sup> MEFs expressing the fusion protein mCherry-EGFP-LC3B were treated with 1 μM ABT-737, 50 μM CQ, and/or 0.1 μM bafilomycin A<sub>1</sub> in complete media or under starvation conditions (HBSS) to induce autophagy. After 24 h, cells were harvested and fluorescence was measured by flow cytometry. Representative experiment of mCherry<sup>+</sup> cells illustrating the gating used to determine GFP<sup>high</sup>.

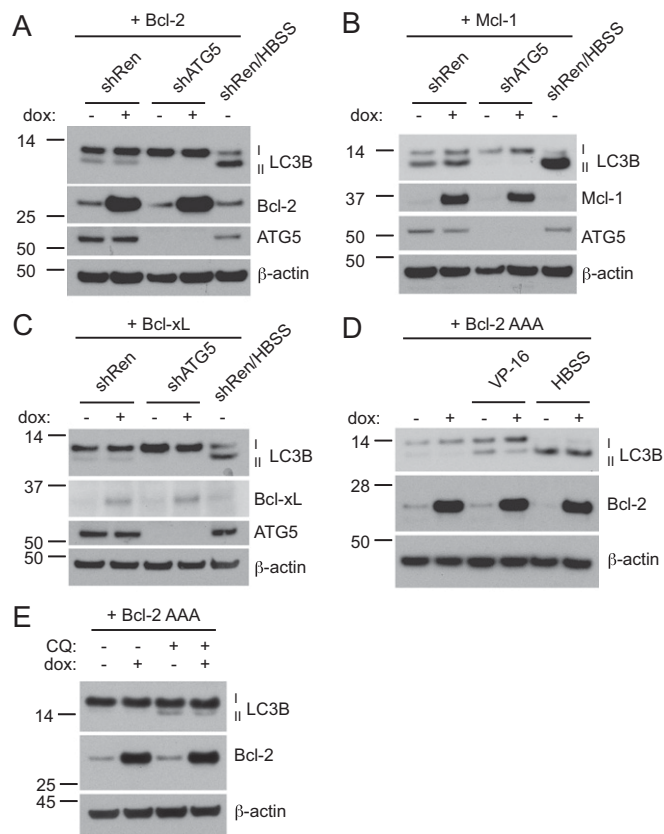

**Fig. S3.** Overexpression of murine B-cell lymphoma 2 (Bcl-2), Mcl-1, or B-cell lymphoma-X large (Bcl-xL) does not affect autophagy in fibroblasts lacking Bax and Bak. (A–C) Western blot of  $Bax^{-/-}Bak^{-/-}$  MEFs expressing a constitutive shRNA to Renilla (negative control) or autophagy related 5 (ATG5) engineered to overexpress (A) Bcl-2, (B) Mcl-1, or (C) Bcl-xL in a dox-inducible manner. Cells were treated with 1  $\mu$ g/mL dox for 24 h prior to a 4-h culture in HBSS where indicated. (D)  $Bax^{-/-}Bak^{-/-}$  MEFs were infected with a dox-inducible Bcl-2 mutant, which cannot be phosphorylated by JNK1 (T69A/S70A/S84A). Cells were treated with 1  $\mu$ g/mL dox for 24 h before addition of 34  $\mu$ M VP-16 or culture in HBSS for 4 h to induce autophagy. (E) LC3B-II turnover is unchanged by prosurvival Bcl-2 AAA overexpression. Western blot after 48 h of 1  $\mu$ g/mL dox to overexpress Bcl-2 (T69A/S70A/S84A) followed by 10  $\mu$ M CQ for 4 h to inhibit LC3B-II degradation.

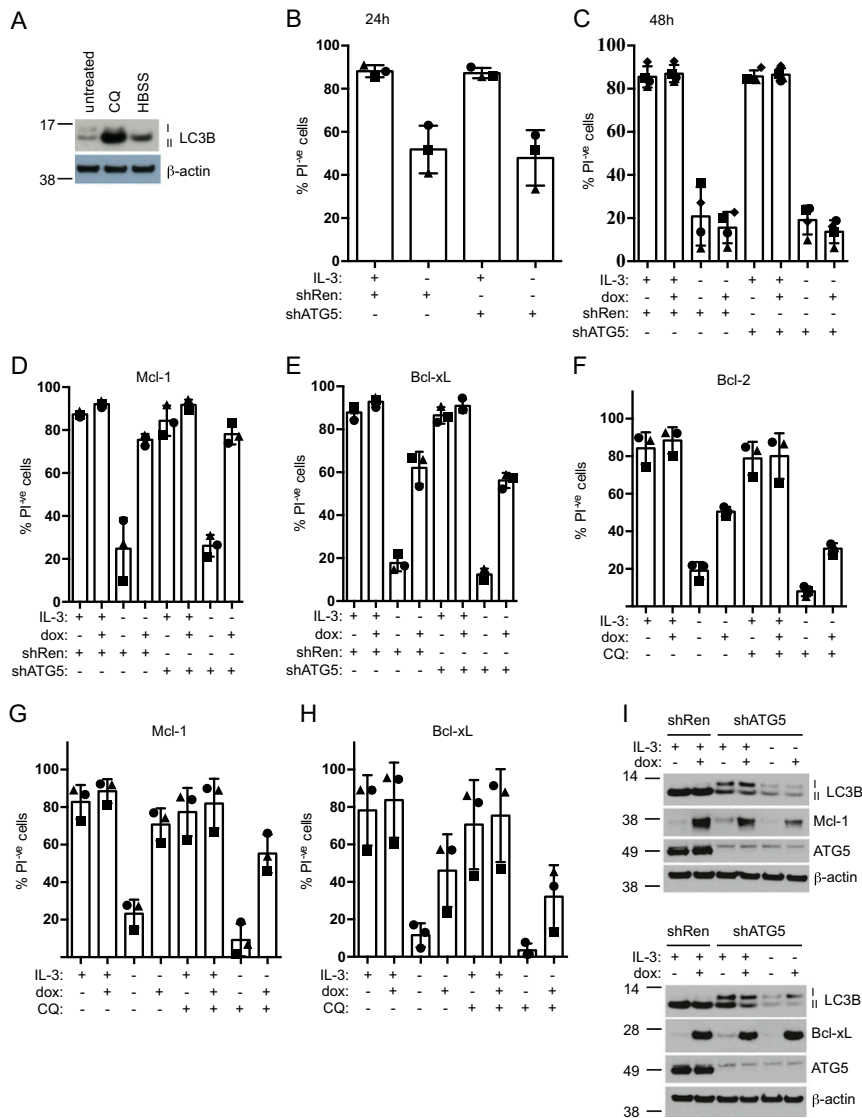

**Fig. 54.** (A) Western blot of *Bax*<sup>-/-</sup>*Bak*<sup>-/-</sup> MEFs after treatment with 10  $\mu$ M chloroquine (CQ) for 16 h or 4 h culture in HBSS were performed in parallel with Fig. 4C. (B and C) The viability of wild-type interleukin-3 (IL-3)-dependent (factor-dependent) myeloid (FDM) cells expressing an shRNA against ATG5 or Renilla was analyzed after (B) 24 h or (C) 48 h IL-3 withdrawal (two independent cell lines). (D and E) IL-3-dependent FDM cells were infected with dox-inducible (D) Mcl-1 or (E) Bcl-xL constructs. The viability was determined after 48 h dox (1  $\mu$ g/mL) treatment and/or IL-3 withdrawal. (F-H) Viability of IL-3 dependent FDM cells after 48 h treatment with 10  $\mu$ M chloroquine (CQ) and 1  $\mu$ g/mL dox to induce (F) Bcl-2, (G) Mcl-1, or (H) Bcl-xL overexpression. (I) LC3B lipidation is unaffected by elevated levels of prosurvival Bcl-2 family members in IL-3-dependent FDM cells lacking Bax and Bak. IL-3-dependent *Bax*<sup>-/-</sup>*Bak*<sup>-/-</sup> FDM cells were infected with a plasmid expressing inducible Mcl-1 or Bcl-xL, and an shRNA against ATG5 where indicated. IL-3 was removed, and 1  $\mu$ g/mL dox was added 4 d before cells were lysed for Western blot analysis. All graphs shown the mean of the individual experiments and error bars represent the SD.

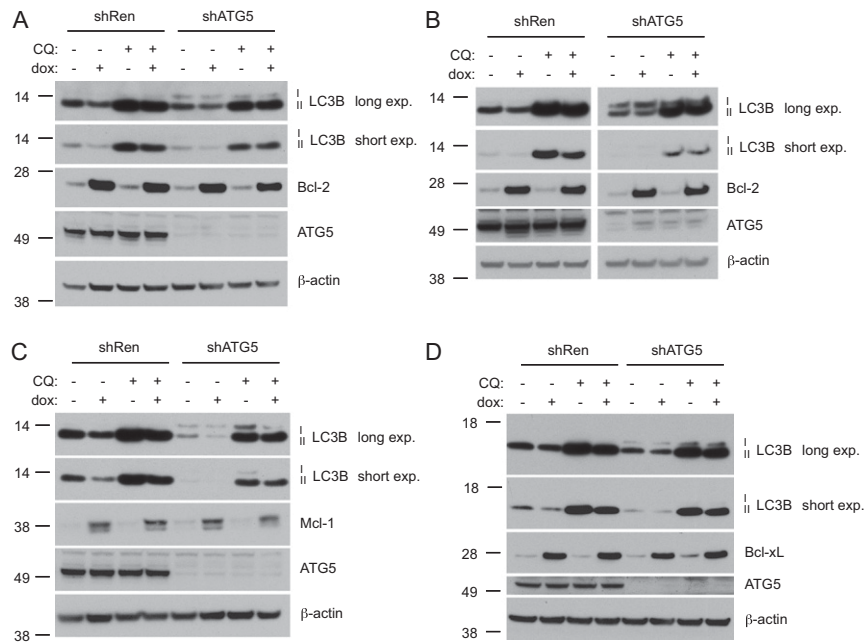

**Fig. S5.** (A–D) LC3B-II turnover is unchanged by prosurvival Bcl-2 family overexpression in *Bax*<sup>-/-</sup> *Bak*<sup>-/-</sup> FDM cells. Western blot after 48 h of dox treatment to induce (A) wild-type Bcl-2, (B) Bcl-2 (T69A/S70A/S84A), (C) Mcl-1, or (D) Bcl-xL followed by 10 μM chloroquine (CQ) for 4 h to inhibit autophagolysosomal function.

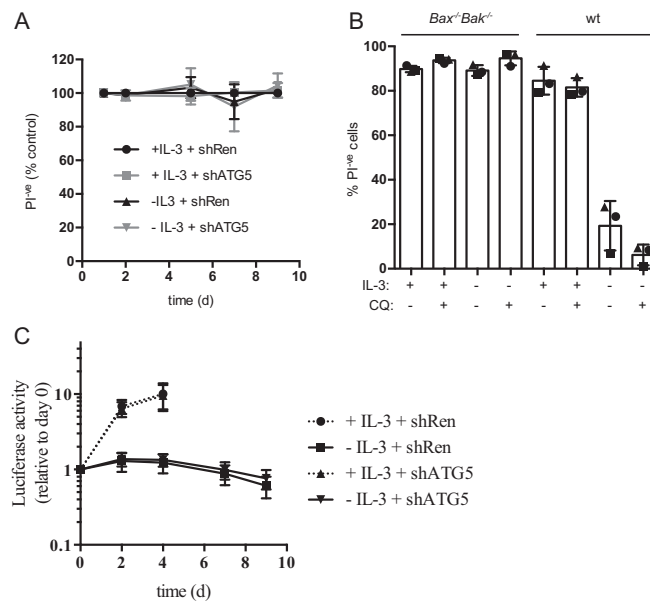

**Fig. S6.** (A) Viability of IL-3-dependent *Bax*<sup>-/-</sup> *Bak*<sup>-/-</sup> FDMs expressing either shRNA against Renilla (negative control) or ATG5 was measured via PI exclusion ( $n = 3$ ). (B) Wild-type and *Bax*<sup>-/-</sup> *Bak*<sup>-/-</sup> IL-3 dependent FDMs were treated with 10 μM chloroquine (CQ) for 48 h before viability was measured using the vital dye PI. (C) Concentration of viable IL-3-dependent FDM cells lacking Bax and Bak was determined using the CellTiter-Glo luminescent cell viability assay ( $n = 9$ ). The mean and SD is shown in all graphs.
